# Supplementary material
Source: PubMed Central journal article supplement (PMC4299221)
Supplement: pnas.201421138SI.pdf [file pnas.201421138SI.pdf]

# Supporting Information

Maitra and Dill 10.1073/pnas.1421138111

## SI Text

**Model Functions and Fitting Data to Obtain the Parameters.** Fig. S1A shows the functions we use for  $f_r$ ,  $f_p$ , and  $f_a$ . We used the following functional forms for them in Eqs. 5–7:

$$f_r(A) = \begin{cases} 0, & \text{if } A < D_r \\ f_r^\infty \cdot \left(1 - \frac{D_r}{A}\right), & \text{if } A \geq D_r \end{cases}, \quad [\text{S1}]$$

$$f_p(A) = f_p^\infty, \quad [\text{S2}]$$

$$k_a(G) = k_a^\infty \cdot f_g(G) \cdot f_a(A), \quad [\text{S3}]$$

$$f_g(G) = \frac{G^{1.5}}{G^{1.5} + D_g^{1.5}}, \quad [\text{S4}]$$

$$f_a(A) = \frac{D_a}{D_a + A}. \quad [\text{S5}]$$

The functions  $f_r(A)/f_r^\infty$  and  $f_p(A)/f_p^\infty$  give the normalized dependences of the respective rates on ATP concentration.  $(f_p/f_p^\infty) \approx 1$  is a good approximation under fast growth; it reflects the near independence of protein synthesis rate on ATP (1). The empirical form  $f_r(A)/f_r^\infty$  approximates complex regulations underlying ribosome biogenesis and deployment (2) and derives from a Michaelis–Menten (MM) expression

$$\frac{f_r(A)}{f_r^\infty} = \frac{(A - D_r)}{D_{ra} + (A - D_r)}, \quad [\text{S6}]$$

where  $D_r$  is an activation energy to synthesize ribosome and  $D_{ra}$  is an affinity parameter. Comparing with experimental data,  $A(\lambda)$  provides similar activation, and the affinity parameters  $D_{ra} \sim D_r$  and substituting in the MM form gives Eq. S1. Its validity is observed in Fig. 2B. Because  $f_r(A)$  is intended to capture the behavior of increase and saturation with  $A$ , our results would be similar if we choose other functional forms. Functions  $f_g(G)$  and  $f_a(A)$  capture, respectively, catabolism of glucose and its feedback inhibition (3). Although the choices of  $f_r(A)$ ,  $f_g(G)$ , and  $f_a(A)$  affect the growth law  $\lambda(G, \mathbf{c}_m)$  and predictions in Fig. 4 C–H, they do not affect the correlations  $\phi - \lambda$  (Eqs. 16 and 17),  $\epsilon - \lambda$  (Eq. S16), the fitness optimum (Eq. 14), and the flux matching (Eq. 15). Our modeling here does not treat external molecules other than glucose.

We estimate the parameters piecewise by fitting our model expressions with data as described below. (i) We get  $f_p^\infty \sim 0.7$  and  $\gamma \sim 0.1 \text{ h}^{-1}$  as the best fit of the data of the RP fraction vs. growth rate using Eq. 16 with the known constant  $k_p^\infty = 9.7 \text{ h}^{-1}$  or 20 aa/s per ribosome (Fig. 2A); (ii) we get  $D_r \sim 0.18 \text{ mM}$  and  $\lambda^\infty \sim 1 \text{ h}^{-1}$  as the best fit of the data of ATP concentration vs. growth rate using Eq. S11 (Fig. 2B); (iii) we get  $D_a \sim 4 \text{ mM}$ ,  $D_g \sim 0.07 \text{ mM}$ , and  $k_a^\infty \sim 120 \text{ h}^{-1}$  by fitting one of the three analytical roots of Eq. 12 against data of growth rate vs. glucose concentration (Fig. 2C); (iv) we choose  $k_r = \lambda_p \sim 5 \text{ h}^{-1}$  based on theory; and (v)  $f_r(A) + f_p(A) < 1$  indicates the cell is subsaturated with energy as far as ribosome function is concerned. For our numerical ODE model  $f_r^\infty + f_p^\infty = 0.9$  (Table 2) implies 90% of ribosomes are active (4).

**ATP as Cellular Energy Status.** Energy status is upshifted with growth rates in *E. coli* and is reflected in the concentration upshift of metabolites such as pyruvate and phosphoenolpyruvate (5) and cofactors such as ATP, GTP, and NADH (6) with specific growth rates. Therefore, there are different choices that we

could have made for the internal energy cache, but ATP concentration is a reasonable surrogate for any of them, because it correlates, and ATP concentration does not violate stringent response, the guanosine tetraphosphate (ppGpp)-mediated inhibition of ribosome synthesis during amino acid starvation, because ppGpp itself is derived from ATP (7).

**The Fitness Expressions.** Here we show the steps that we use for deriving Eq. 12. Substituting the definitions of the rates  $J_a$ ,  $J_r$ , and  $J_p$  (Eqs. 5–7) into Eq. 10 gives

$$(m_r k_r f_r + m_p k_p f_p) \left(\frac{R}{P}\right) = m_a k_a. \quad [\text{S7}]$$

Further substituting Eq. 8 for R/P and using Eq. 9 converts Eq. S7 to

$$(\lambda + \gamma) \left[ \lambda + \left(\frac{m_p k_p}{m_r}\right) f_p \right] = \left(\frac{m_a k_a}{m_p}\right) \left(\frac{m_p k_p}{m_r}\right) f_p. \quad [\text{S8}]$$

Defining the terms  $\lambda_p \equiv (m_p k_p / m_r)$  and  $\lambda_a \equiv (m_a k_a(G) / m_p)^*$  and then rearranging Eq. S8 gives

$$\frac{\lambda^2}{\lambda_p f_p} + \lambda \left(1 + \frac{\gamma}{\lambda_p f_p}\right) + (\gamma - \lambda_a) = 0. \quad [\text{S9}]$$

Based on observations (Fig. S2B),  $f_p[A(G)]$  reaches constant values with growth rates, so we make the approximation of  $f_p[A(G)] \rightarrow f_p^\infty$  over the entire growth range. Next, to obtain the cubic polynomial in  $\lambda$  (Eq. 12) and its coefficients, we expand Eq. S9 completely in terms of  $\lambda$  by writing  $\lambda_a$  explicitly in terms of  $\lambda$

$$\lambda_a[G, \lambda(G)] = \left(\frac{m_a k_a^\infty}{m_p}\right) \cdot \frac{G^{1.5}}{D_g^{1.5} + G^{1.5}} \cdot \frac{D_a}{D_a + \frac{D_r}{1 - (\lambda/\lambda^\infty)}}, \quad [\text{S10}]$$

using the correlation of ATP concentration and  $\lambda$  from Eqs. 9, 11, and S1

$$A = \frac{D_r}{1 - (\lambda/\lambda^\infty)}. \quad [\text{S11}]$$

We get

$$a_3 \lambda^3 + a_2 \lambda^2 + a_1 \lambda + a_0 = 0, \quad [\text{S12}]$$

where the coefficients are

$$a_0 \equiv \lambda^\infty \lambda_p f_p^\infty \left[ \delta \gamma - \lambda_a^\infty \left(\frac{G^{1.5}}{D_g^{1.5} + G^{1.5}}\right) \right], \quad [\text{S13}]$$

$$a_1 \equiv \lambda_p f_p^\infty \left[ \lambda_a^\infty \left(\frac{G^{1.5}}{D_g^{1.5} + G^{1.5}}\right) + \delta \lambda^\infty - \gamma \right] + \delta \gamma \lambda^\infty,$$

$$a_2 \equiv \delta \lambda^\infty - \lambda_p f_p^\infty - \gamma,$$

$$a_3 \equiv -1,$$

\* $\lambda_a$  is the ratio of a cell's total ATP generation flux to the ATP cost of making 1 NRP molecule; it has units of hours<sup>-1</sup> and represents a driver of biomass growth. It has an impression of efficiency of the metabolic proteins for energy production and could also be measured from experiments.

and where we defined  $\lambda_a^\infty = (m_a k_a^\infty)/m_p$  and  $\delta = 1 + (D_r/D_a)$ . The solution of Eq. S12 yields three real roots, of which only one determines the observed glucose dependence of the specific growth rate  $\lambda(G)$ , the Monod law. It is readily found that  $\lambda \equiv \lambda(G)$  in Eq. 12 gives a Monod-like growth function, the shape of which depends on constants  $\lambda_a^\infty$ ,  $D_g$ ,  $\delta$ ,  $\lambda_p$ ,  $f_p^\infty$ ,  $\lambda^\infty$ , and  $\gamma$ .

**Ribosomal Efficiency: The Net Peptide Elongation Rate.** Here, we derive the relationship between the peptide elongation rate  $k_{per}$  and ribosomal fraction  $\phi(\lambda)$ . We begin by defining  $k_{per}$  in terms of fluxes  $J_r$  and  $J_p$  defined in Eqs. 5 and 6

$$k_{per} = (N_r J_r + N_p J_p \cdot \chi) / R = N_r \left( \lambda + k_p' f_p \cdot \frac{\lambda}{\lambda + \gamma} \right), \quad [\text{S14a}]$$

$$= N_r \frac{\lambda}{\phi(\lambda)}. \quad [\text{S14b}]$$

Here,  $N_r = 7336$  and  $N_p = 325$  are the respective number of amino acid residues per ribosome and NRP molecule, and the latter's likelihood for turnover is  $\chi = (\frac{\lambda}{\lambda + \gamma})$ . In Fig. 5, we plot Eq. S14a using  $f_p = f_p^\infty$ .

**The Energy Efficiency  $\varepsilon$ : Definition and Properties.** We define the energy efficiency of growth as the mass rate of proteins produced per mole rate of ATP spent

$$\varepsilon = \frac{\text{mass flux of all proteins produced}}{\text{molar flux of ATP synthesized}} = \frac{\rho \lambda}{m_a J_a}, \quad [\text{S15}]$$

and, it is expressed in units of gram-weight of cells per mole of ATP consumed. Because energy is also spent in the synthesis of nonprotein material, including lipids, carbohydrates, and fatty acids, we make an estimate using the theoretical ATP requirements from Neijssel et al. (ref. 8, table 4) for *E. coli* growing in glucose that our model is neglecting about 15% of the total energy produced. Therefore, our estimate of  $\varepsilon$  is overestimated by this percentage. The protein density is denoted by  $\rho$ .

To derive Eq. 13, we start from Eq. S15 and substitute Eq. 10 for  $m_a J_a$

$$\begin{aligned} \varepsilon(\lambda, f_p) &= \frac{\rho \lambda}{m_a J_a} = \frac{\rho \lambda}{\rho \phi \left[ \left( \frac{\lambda}{\varepsilon_r} \right) + \left( \frac{k_p' f_p}{\varepsilon_p} \right) \right]} \\ &= \frac{\lambda}{\left[ \frac{\lambda + \gamma}{\lambda + \gamma + k_p' f_p} \right] \left[ \left( \frac{\lambda}{\varepsilon_r} \right) + \frac{k_p' f_p}{\varepsilon_p} \right]}. \end{aligned} \quad [\text{S16}]$$

In the second line, we replaced  $\phi$  from Eq. 16. The term in the square bracket of the denominator of the first equation is the total cost of synthesizing all proteins (RP + NRP) per unit time per ribosome.  $(1/\varepsilon_r)$  and  $(1/\varepsilon_p)$  are the respective costs of making RPs and NRPs in units of moles of ATP per gram of ribosome or NRP. Experimental  $\phi(\lambda)$  data can be transformed to  $\varepsilon(\lambda)$  from Eq. S16 by eliminating  $k_p' f_p$  via Eq. 16

$$\varepsilon(\lambda; \gamma, \varepsilon_r, \varepsilon_p) = \frac{\frac{\lambda}{\lambda + \gamma}}{\frac{\lambda}{\lambda + \gamma} \cdot \frac{\phi}{\varepsilon_r} + \frac{(1 - \phi)}{\varepsilon_p}}. \quad [\text{S17}]$$

To derive Eq. 14, we substitute the constraint  $f_r^\infty + f_p^\infty = 1$  into Eq. S16 to get

$$\varepsilon(f_p^\infty) \equiv \varepsilon \left[ k_r \left( 1 - f_p^\infty \right), f_p^\infty \right]. \quad [\text{S18}]$$

Then, to find the value  $f_p^\infty = f_p^{\infty*}$  that maximizes  $\varepsilon(f_p^\infty)$ , we set the derivative to zero, i.e.,  $d\varepsilon(f_p^\infty)/df_p^\infty = 0$ , and solve for  $f_p^\infty$ . This gives the result shown in Eq. 14, where  $\varepsilon_{rp} = (\varepsilon_p - \varepsilon_r)/\varepsilon_r$ , and we removed small terms involving  $\gamma^2$  and  $\gamma^3$ . It also gives the growth rate at the point of optimal energy efficiency

$$\lambda^{\infty*} = k_r \left( 1 - f_p^{\infty*} \right) \approx \frac{\gamma}{\varepsilon_{rp}} \left( 1 - \frac{k_p'}{k_r} \right) + \sqrt{\frac{\gamma}{\varepsilon_{rp}} k_p'}, \quad [\text{S19}]$$

where  $\varepsilon_{rp} = (\varepsilon_p - \varepsilon_r)/\varepsilon_r$ . Eqs. 14 and S19 do not depend on the form of  $f_r(A)$  and  $f_p(A)$ .

To split efficiency contributions from R and P components in Fig. 4A, Eq. S16 can be exactly written as

$$\varepsilon = \varepsilon_r' + \varepsilon_p' = \varepsilon_r j_r + \varepsilon_p \left( \frac{\lambda}{\lambda + \gamma} \right) j_p, \quad [\text{S20}]$$

where  $j_r = j_r(\lambda) = \lambda / (\lambda + \lambda_p f_p)$  and  $j_p(\lambda) = 1 - j_r(\lambda)$  are the fractional ATP fluxes along the respective R and P paths, and the factor  $(\frac{\lambda}{\lambda + \gamma})$  corrects  $\varepsilon_p$  due to protein turnover with rate  $\gamma$ .

**Flux Matching at High Speeds.** Here, we derive Eq. 15:  $\lambda^\infty = k_r f_r^\infty = \lambda_a f_p^\infty$ . First, we note that under fast-growth conditions, all ribosomes are busy either making ribosomes or making NRPs; hence, under those conditions, we have the constraint

$$f_r^\infty + f_p^\infty = 1. \quad [\text{S21}]$$

Under slower-growth conditions, some ribosomes are typically unused. Under fast growth, we also have  $\gamma = 0$ . Now,  $\lambda \equiv \lambda(\lambda_a, k_r, \lambda_p)$  is a function of three rates. By combining Eqs. S9, 11, and S21, we get

$$\left( \frac{1}{\lambda_p} - \frac{1}{k_r} \right) \lambda^2 + \lambda - \lambda_a f_p^\infty = 0 \Rightarrow \left( \frac{1}{\lambda_p} - \frac{1}{k_r} \right) \lambda^2 + \left( 1 + \frac{\lambda_a}{k_r} \right) \lambda - \lambda_a = 0, \quad [\text{S22}]$$

The positive solution of Eq. S22 can be written as

$$\lambda^\infty = \frac{\lambda_a}{1 + \lambda_a/k_r} [1 - \beta + 2\beta^2 - \dots], \quad [\text{S23}]$$

where we have simplified this expression by defining

$$\beta \equiv \lambda_a \frac{1/\lambda_p - 1/k_r}{(1 + \lambda_a/k_r)^2}, \quad [\text{S24}]$$

for  $0 \leq |\beta| \ll 1/4$ .  $\beta$  is expected to be small in general. By setting  $\beta \approx 0$ , a line of steepest ascent in the fitness landscape, we get a limiting expression for growth rate (9)

$$\lambda^\infty \sim \lambda_p \frac{\lambda_a(G)}{\lambda_p + \lambda_a(G)}. \quad [\text{S25}]$$

Comparing against Eq. 11, we find that  $f_r^\infty = \lambda_a / (k_r + \lambda_a)$ . Because  $f_p^\infty = 1 - f_r^\infty$ , we have  $f_p^\infty = k_r / (k_r + \lambda_a)$ , giving the result in Eq. 15.

An interesting result is an estimate of the relative rank ordering of rate coefficients. By using  $f_p^\infty = 0.8$  and  $f_r^\infty = 0.2$ , we get

$$\lambda_a < k_r \leq k_p'. \quad [\text{S26}]$$

This indicates that the slowest rate coefficient (under fast growth) is  $\lambda_a$ , which characterizes metabolism and not the production of protein.
